# Supplementary material
Source: Royal Society of Chemistry journal article supplement (doi:10.1039/d6ta02669a)
Supplement: d6ta02669a1.pdf [file d6ta02669a1.pdf]

## Supporting information

### **Programmable Atomic Neighborhoods in Copper Rewire the Oxygenate Pathway to Ethanol**

*Chi-Wei Chou<sup>a, †</sup>, Ding-Huei Tsai<sup>a, †</sup>, Ying-Rui Lu<sup>b</sup>, Yung-Jung Chuang<sup>c</sup>, Yung-Tin (Frank) Pan<sup>a</sup>, Tsu-Chin Chou<sup>c,d</sup>, Wei-Shun Chang<sup>e</sup> and Hsing-Yu Tuan<sup>a,f,\*</sup>*

*C.-W. Chou, D.-H. Tsai, Y.-R. Lu, Y.-J. Chuang, Y.-T. (Frank) Pan, T.-C. Chou, W.-S. Chang<sup>e</sup> and, H.-Y. Tuan<sup>\*</sup>*

<sup>a</sup> Department of Chemical Engineering, National Tsing Hua University, Hsinchu, 30013, Taiwan

<sup>b</sup> National Synchrotron Radiation Research Center, Hsinchu, 30076, Taiwan

<sup>c</sup> Institute of Analytical and Environmental Sciences, National Tsing Hua University, Hsinchu, 30013, Taiwan

<sup>d</sup> College of Sustainability, National Tsing Hua University, Hsinchu, 30013, Taiwan

<sup>e</sup> Department of Chemistry and Biochemistry, University of Massachusetts Dartmouth, 285 Old Westport Rd, North Dartmouth, MA 02747, United States

<sup>f</sup> Department of Chemical Engineering, Chung Yuan Christian University, Chungli, Taoyuan, 32023, Taiwan

Email: [hytuan@che.nthu.edu.tw](mailto:hytuan@che.nthu.edu.tw)

†: These authors contributed equally to this work and share first authorship.

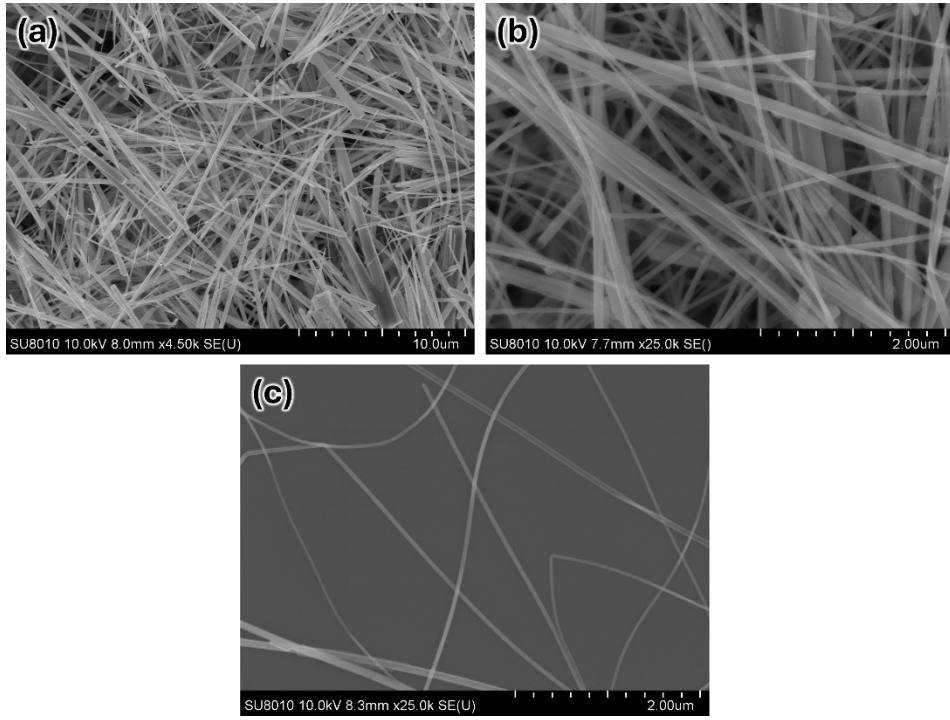

**Figure S1.** SEM pattern of Cu NWs.

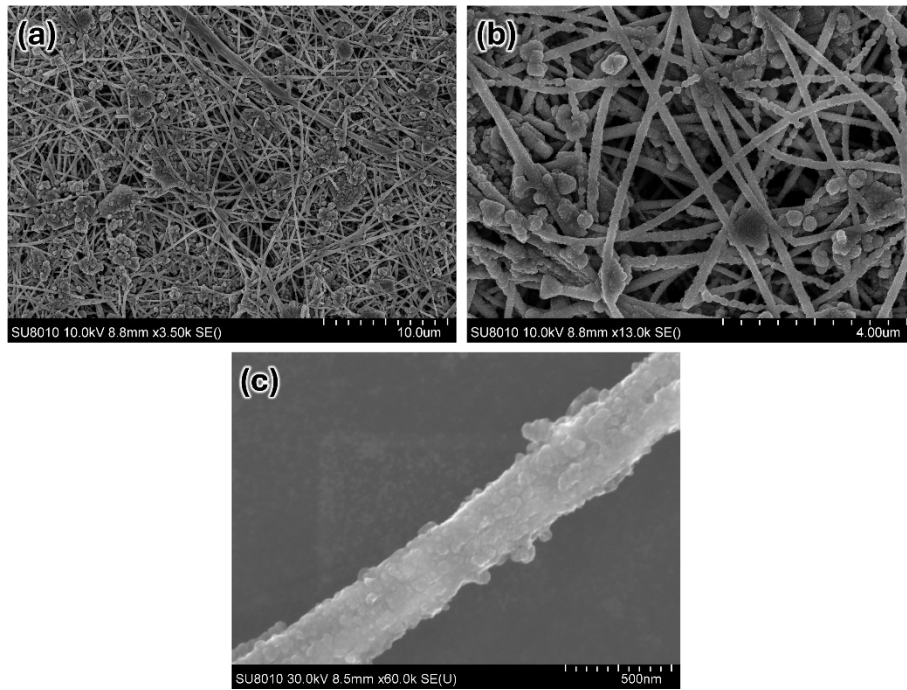

**Figure S2.** SEM pattern of cluster/Cu NWs.

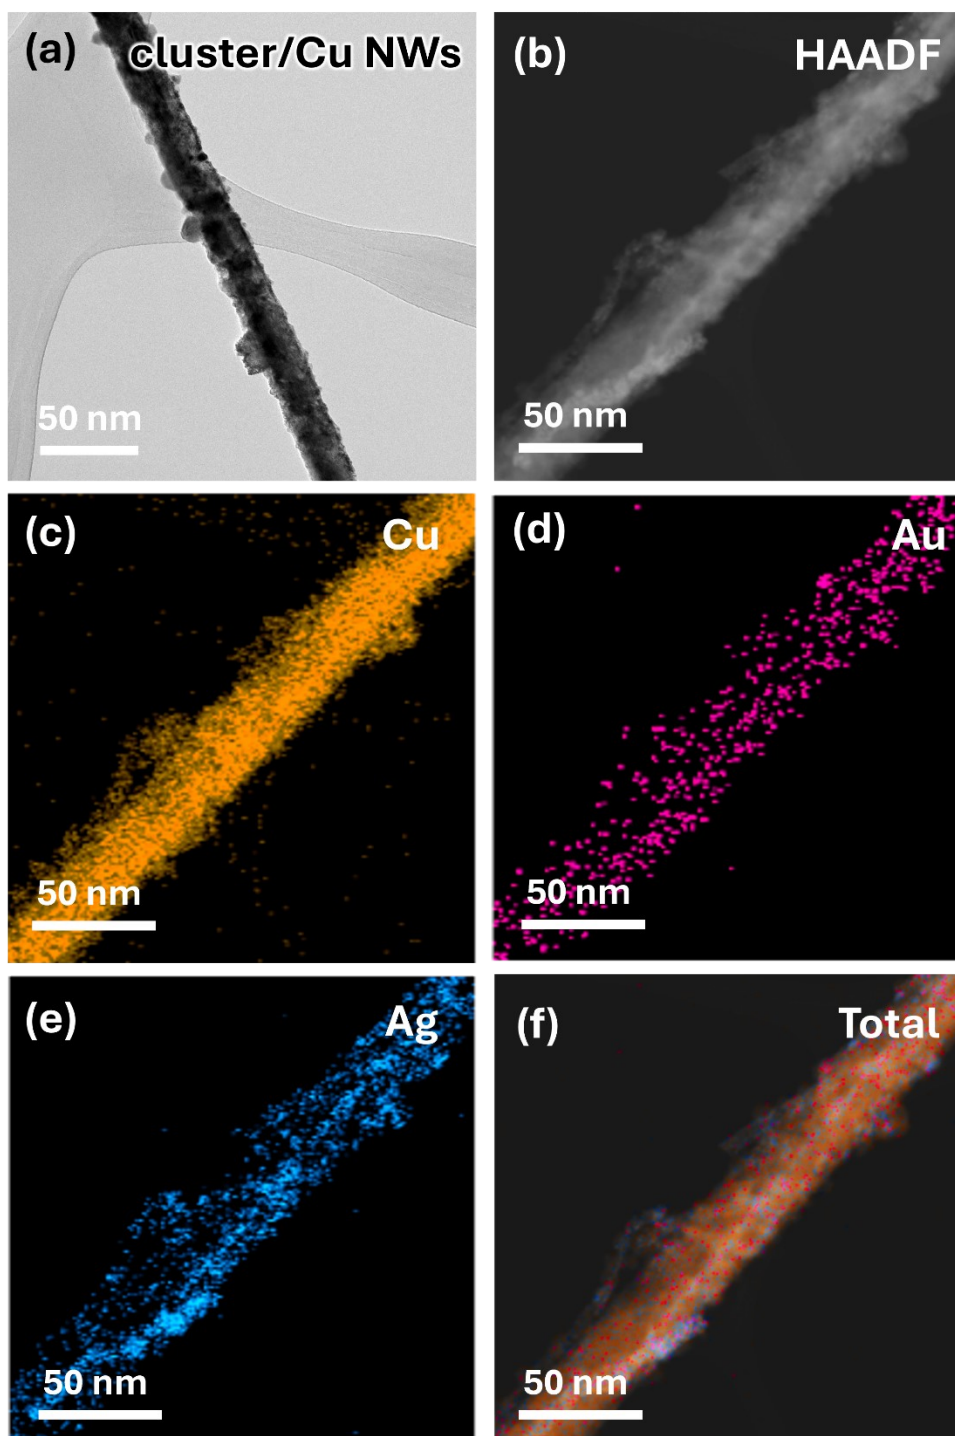

**Figure S3.** a) TEM images of cluster/Cu NWs. b) HAADF-STEM image c-f) corresponding EDS overlay mapping of cluster/Cu NWs, with elemental maps of Cu, Ag, and Au.

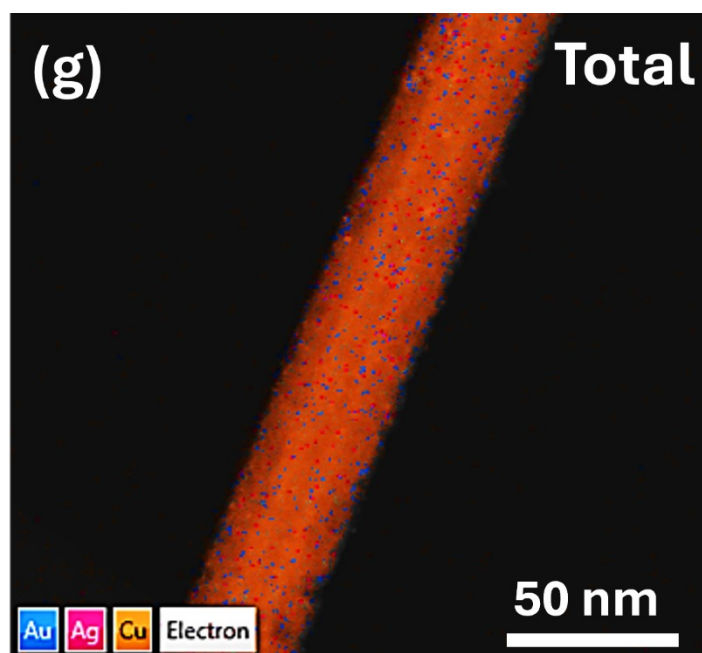

Figure S3. SEM pattern of cluster/Cu NWs.

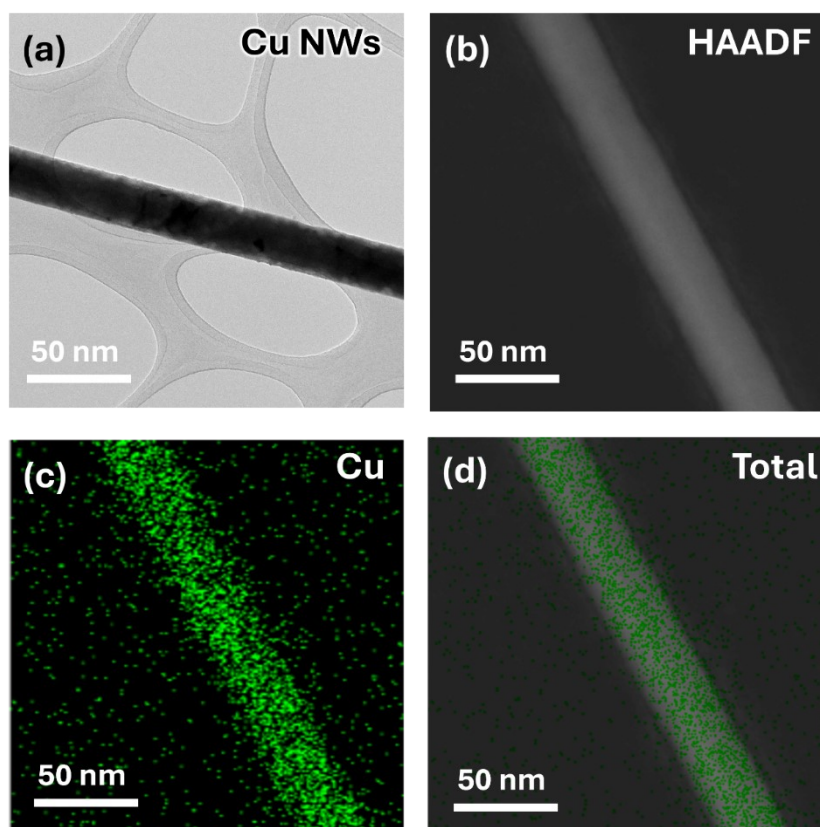

Figure S4. a) TEM images of Cu NWs. b) HAADF-STEM image c-d) corresponding EDS overlay mapping of Cu NWs, with elemental maps of Cu.

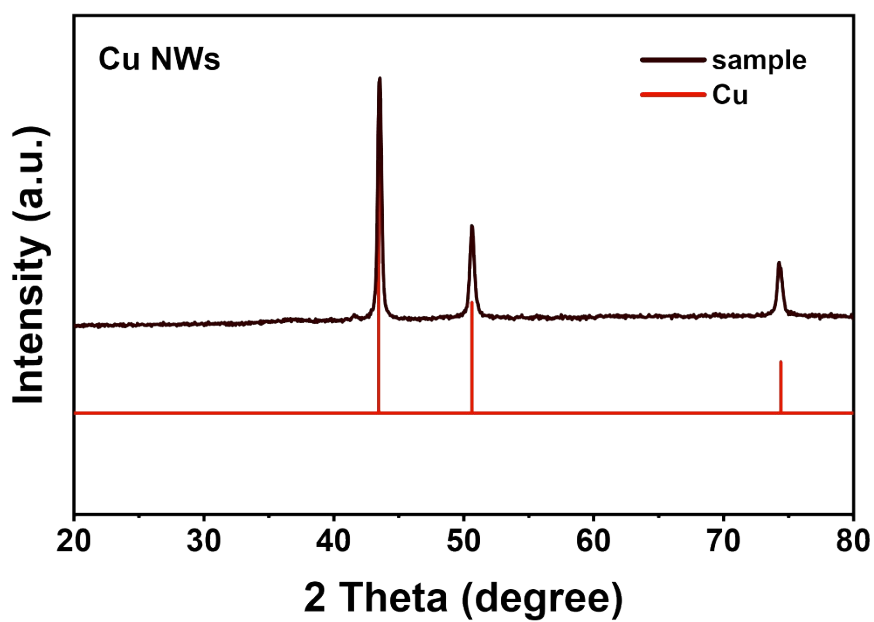

Figure S5. XRD pattern of Cu NWs.

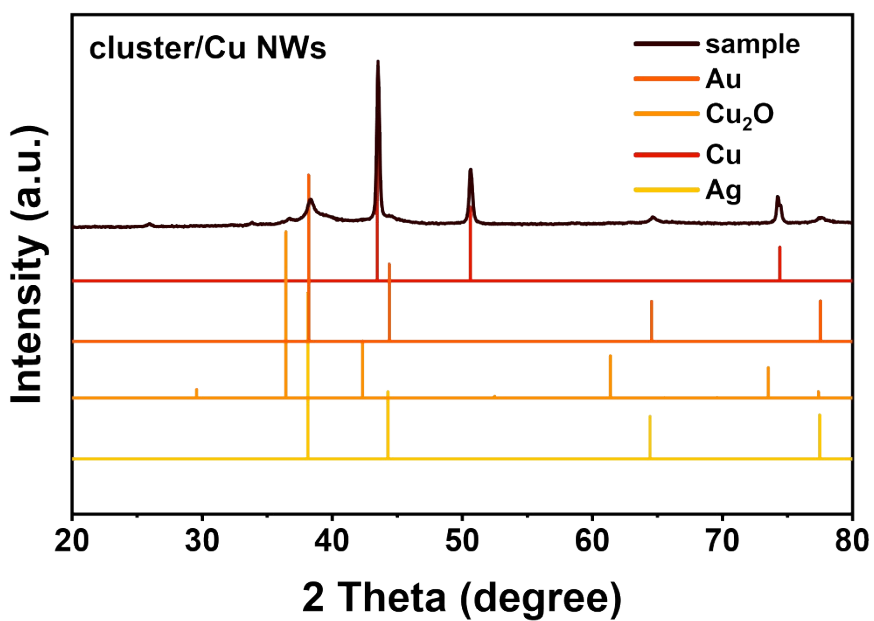

Figure S6. XRD pattern of cluster/Cu NWs.

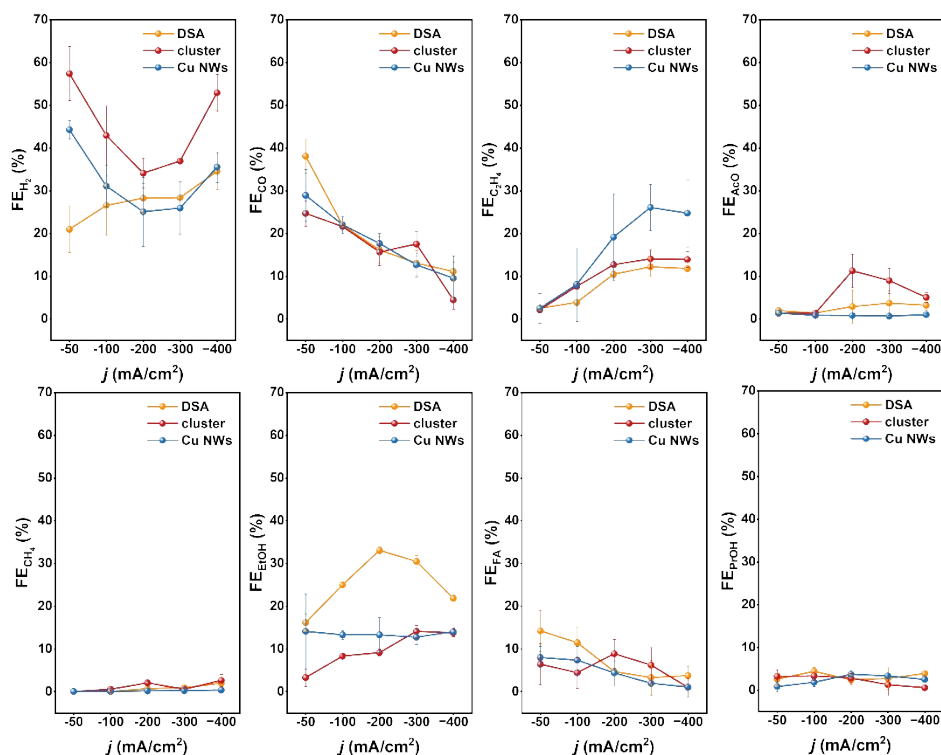

**Figure S7.** Faradaic efficiencies of major CO<sub>2</sub>RR products (C<sub>2</sub><sup>+</sup>, CO, C<sub>2</sub>H<sub>4</sub>, AcO<sup>-</sup>, CH<sub>4</sub>, EtOH, FA, and PrOH) as a function of the effective CO<sub>2</sub>RR current density ( $j_{\text{CO}_2\text{RR}}$ ) for Cu NWs, cluster/Cu NWs, and DSA/Cu NWs.

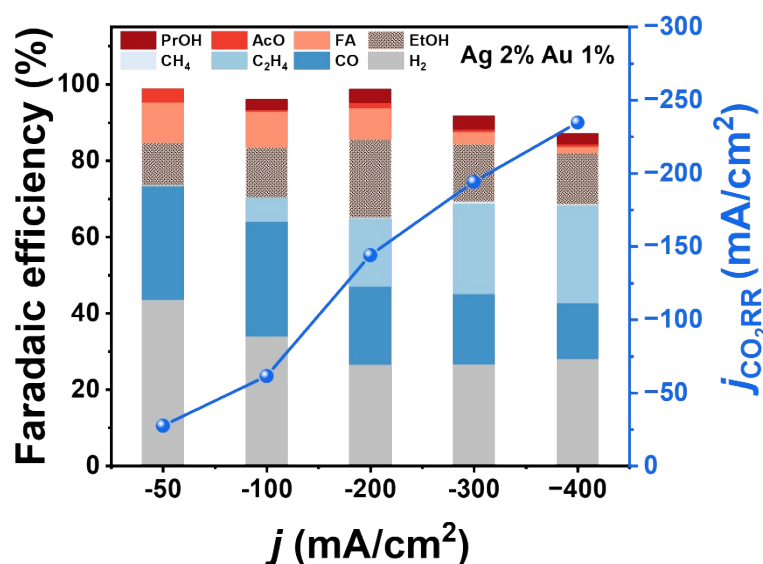

**Figure S8.** The effect operating current density on the FE of different products while using different ratio of Ag-Au (2% of Ag and 1% of Au) on Cu NWs.

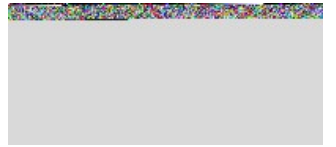

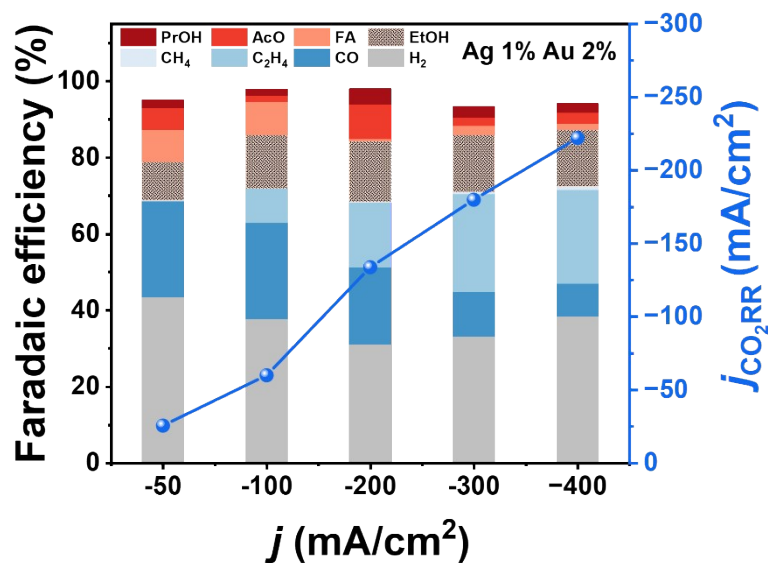

**Figure S9.** The effect operating current density on the FE of different products while using different ratio of Ag-Au (1% of Ag and 2% of Au) on Cu NWs.

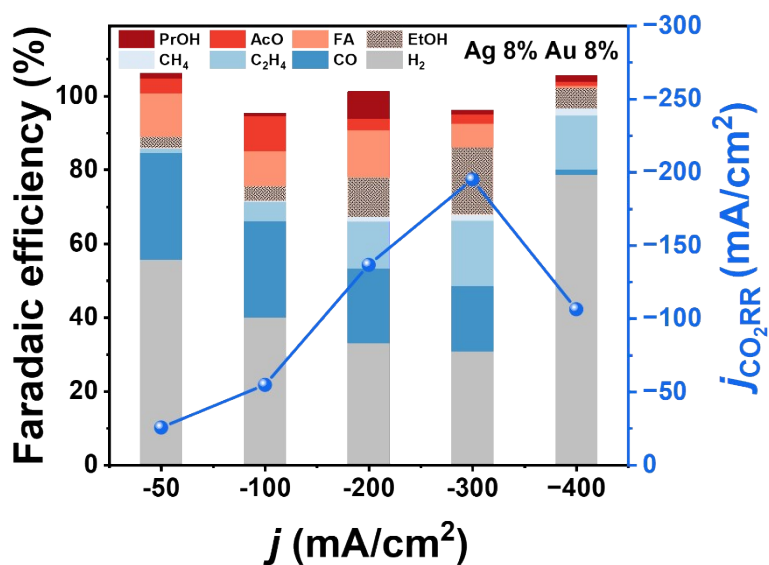

**Figure S10.** The effect operating current density on the FE of different products while using different ratio of Ag-Au (8% of Ag and 8% of Au) on Cu NWs.

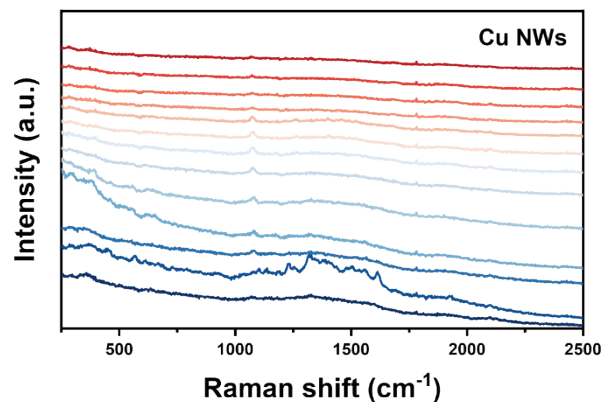

**Figure S11.** Potential-dependent operando Raman spectra of DSA/Cu NWs collected under stepwise cathodic biases during CO<sub>2</sub>RR..

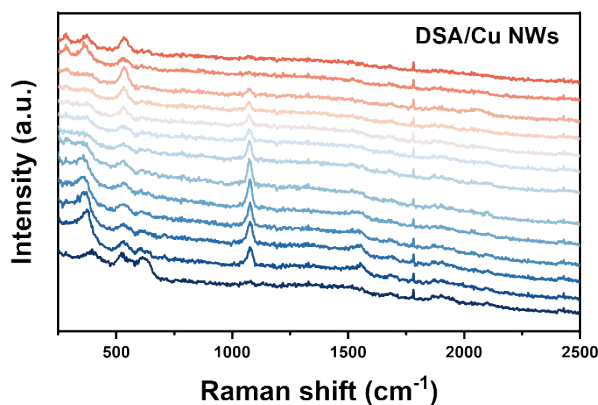

**Figure S12.** Potential-dependent operando Raman spectra of Cu NWs collected under stepwise cathodic biases during CO<sub>2</sub>RR.

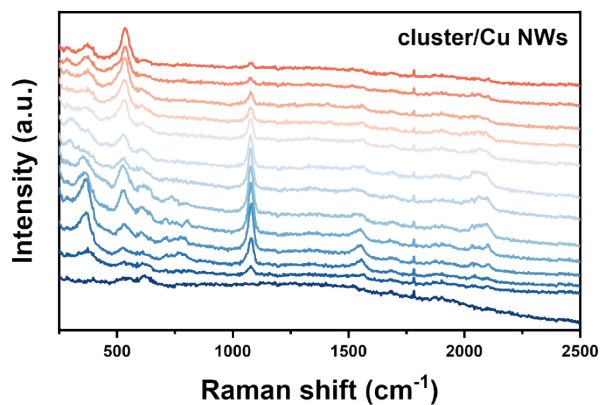

**Figure 13.** Potential-dependent operando Raman spectra of cluster/Cu NWs collected under stepwise cathodic biases during CO<sub>2</sub>RR.

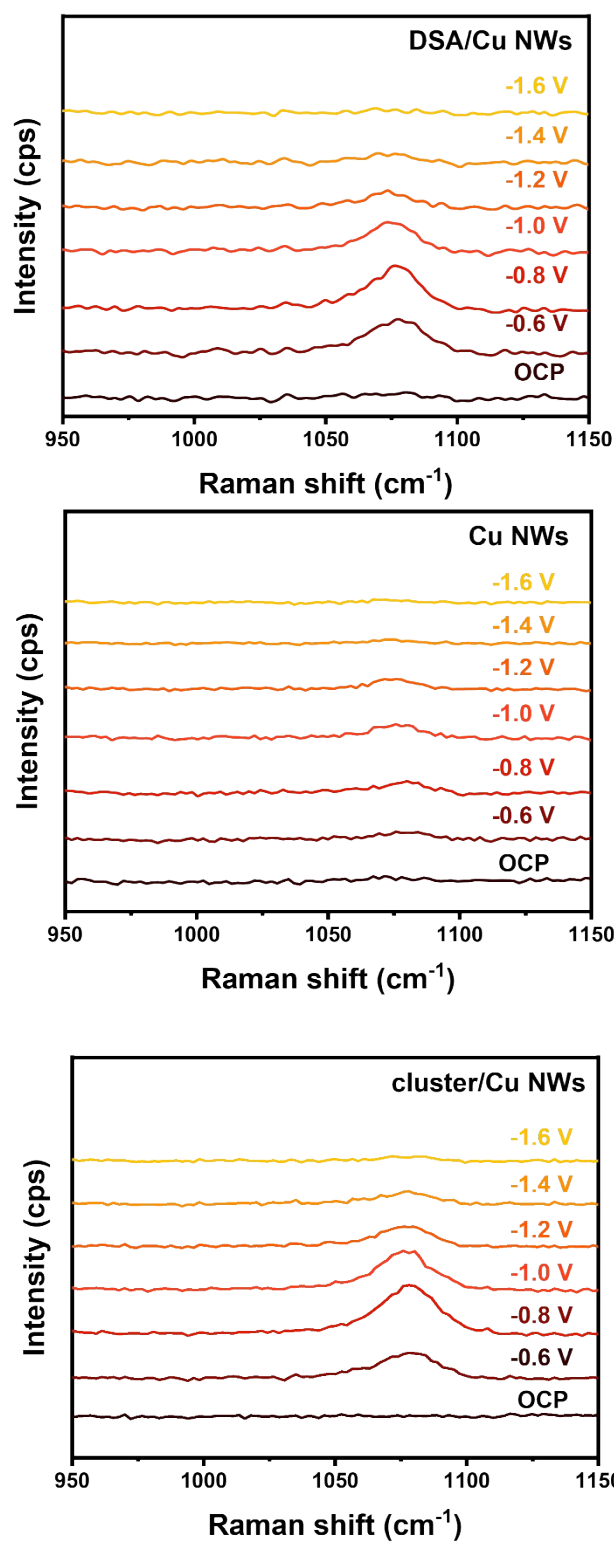

**Figure S14.** Potential-dependent operando Raman spectra (950–1150 cm<sup>-1</sup>) of Cu NWs, DSA/Cu NWs, and cluster/Cu NWs collected under stepwise cathodic biases during CO<sub>2</sub>RR.

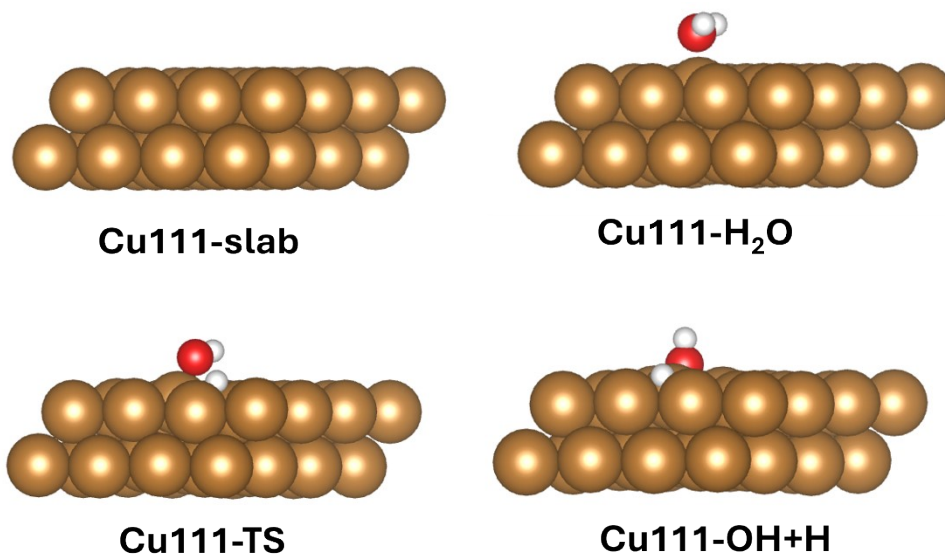

**Figure S15.** Optimized structural models of H<sub>2</sub>O adsorption and stepwise dissociation (\*H<sub>2</sub>O → \*OH + \*H) on Cu NWs.

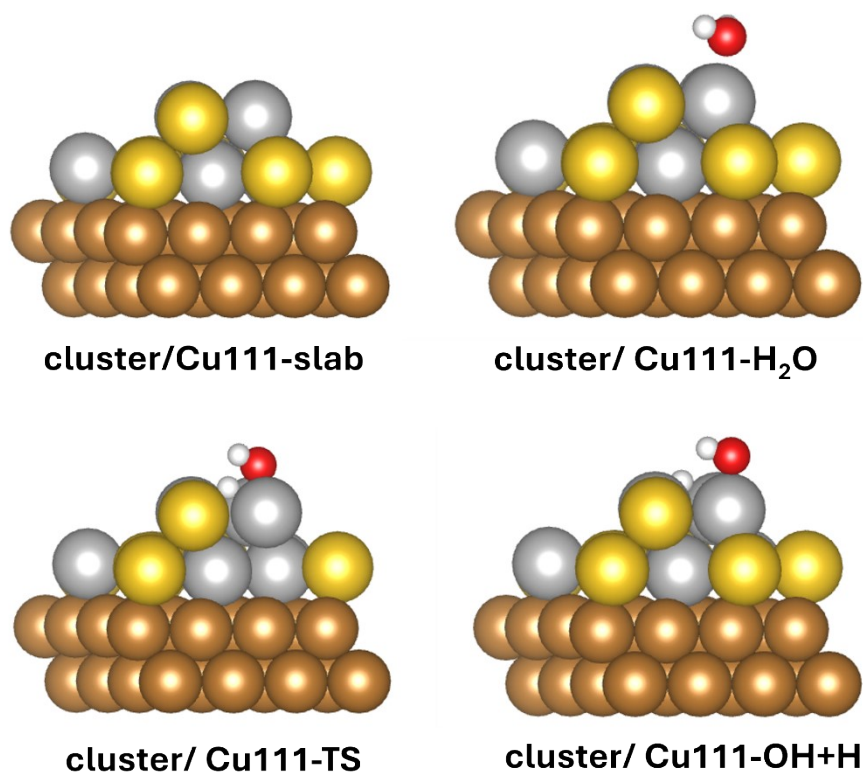

**Figure S16.** Optimized structural models of H<sub>2</sub>O adsorption and stepwise dissociation (\*H<sub>2</sub>O → \*OH + \*H) on cluster/Cu NWs.



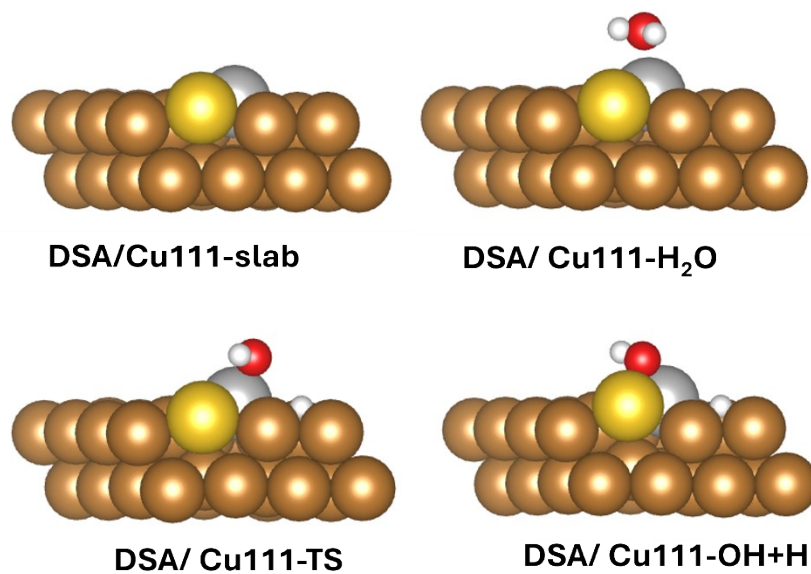

**Figure S17.** Optimized structural models of H<sub>2</sub>O adsorption and stepwise dissociation (\*H<sub>2</sub>O → \*OH + \*H) on DSA/Cu NWs.

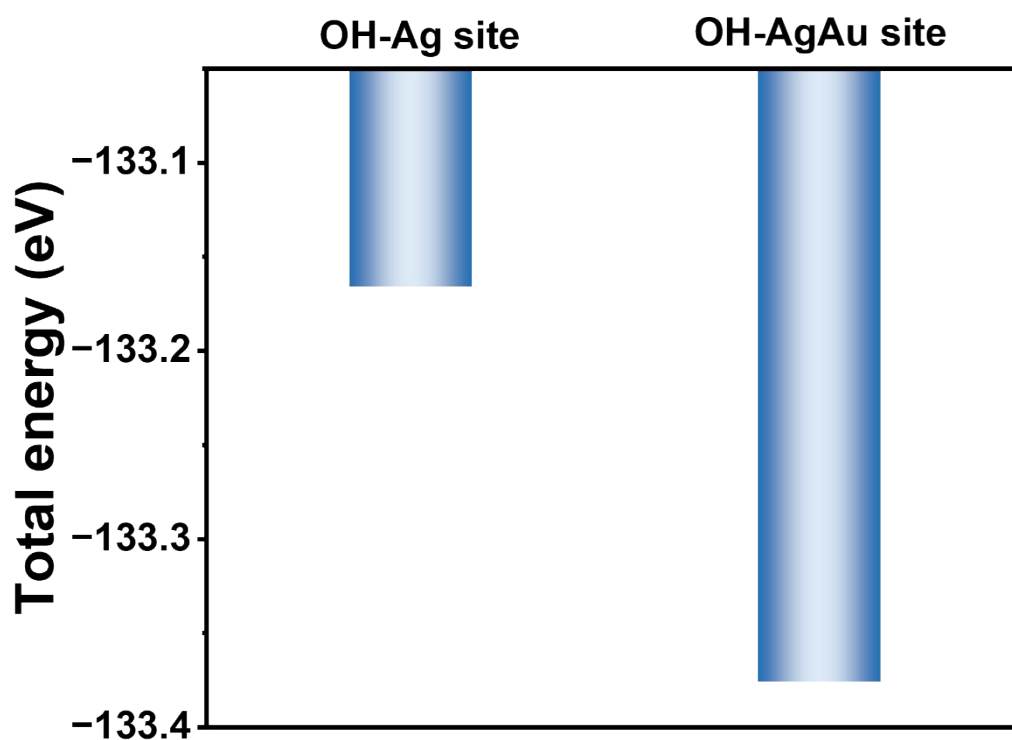

**Figure S18.** Calculated free-energy diagrams for H<sub>2</sub>O adsorption DSA/Cu NWs surfaces.



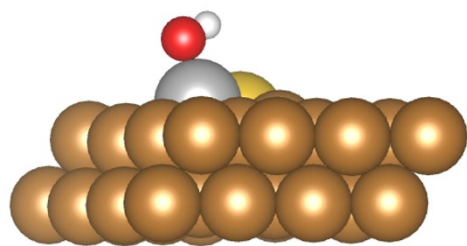

**DSA/ Cu111-HO-Ag site**

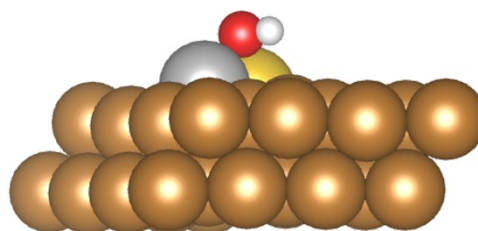

**DSA/ Cu111-HO-AgAu site**

**Figure S19.** Optimized adsorption configurations of H<sub>2</sub>O on DSA/Cu NWs surfaces.

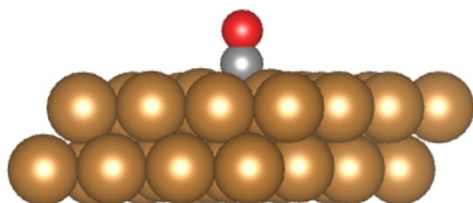

**Cu111-CO**

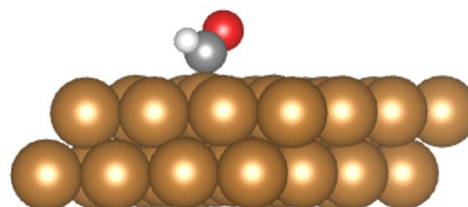

**Cu111-CHO**

**Figure S20.** Optimized adsorption configurations of \*CO on Cu(111)- modified surfaces.

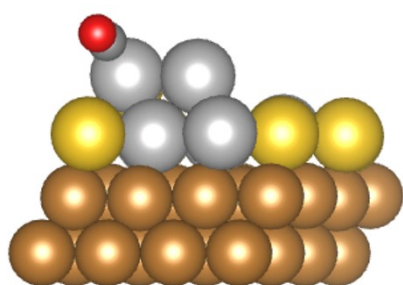

**cluster/Cu111-CO**

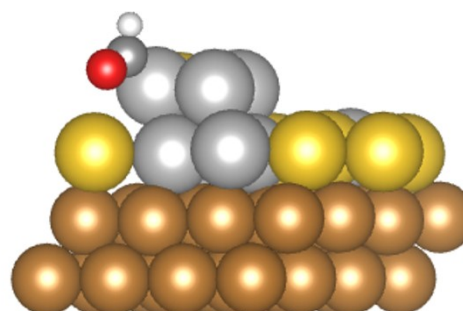

**cluster/ Cu111-CHO**

**Figure S21.** Optimized adsorption configurations of oxygenated intermediates on cluster-modified Cu(111) surfaces.

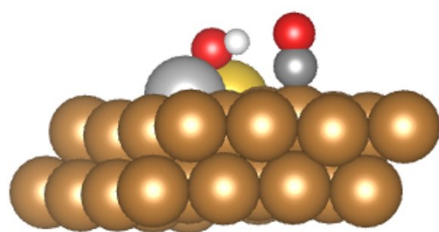

**DSA/Cu111-CO**

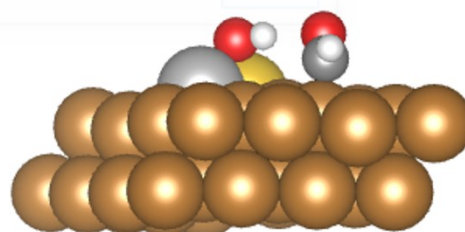

**DSA/ Cu111-CHO**

**Figure S22.** Optimized C–C coupling configurations (\*CO–\*CHO) on DSA-modified Cu(111) surfaces.

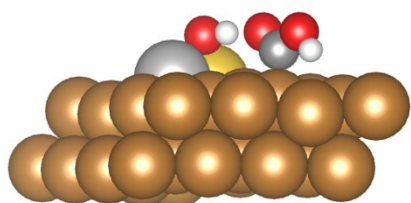

**DAS/Cu111-COOH**

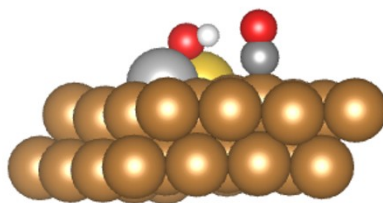

**DAS/Cu111-CO**

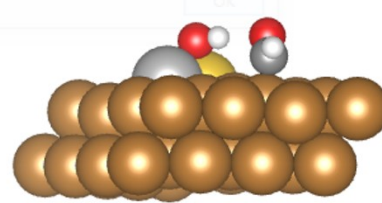

**DAS/Cu111-CHO**

**Figure S23.** Optimized intermediates along the C1 hydrogenation pathway on DSA/Cu NWs.

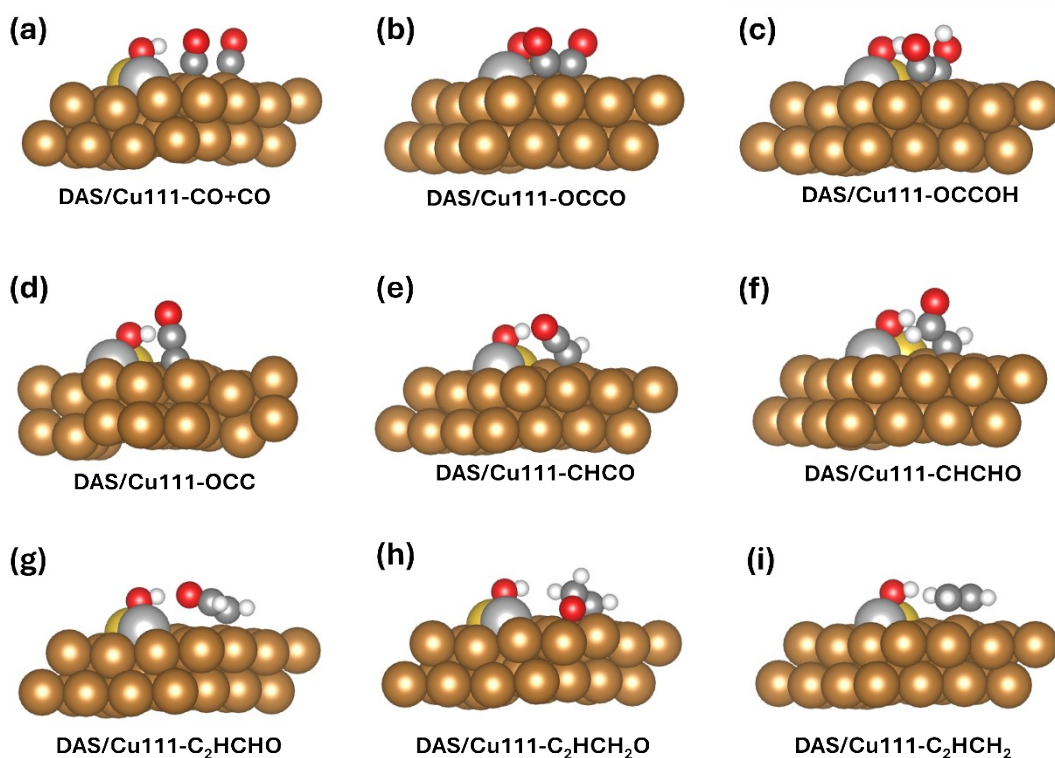

**Figure S24.** Optimized reaction intermediates along the C–C coupling pathway leading to ethylene formation on the catalyst surface.

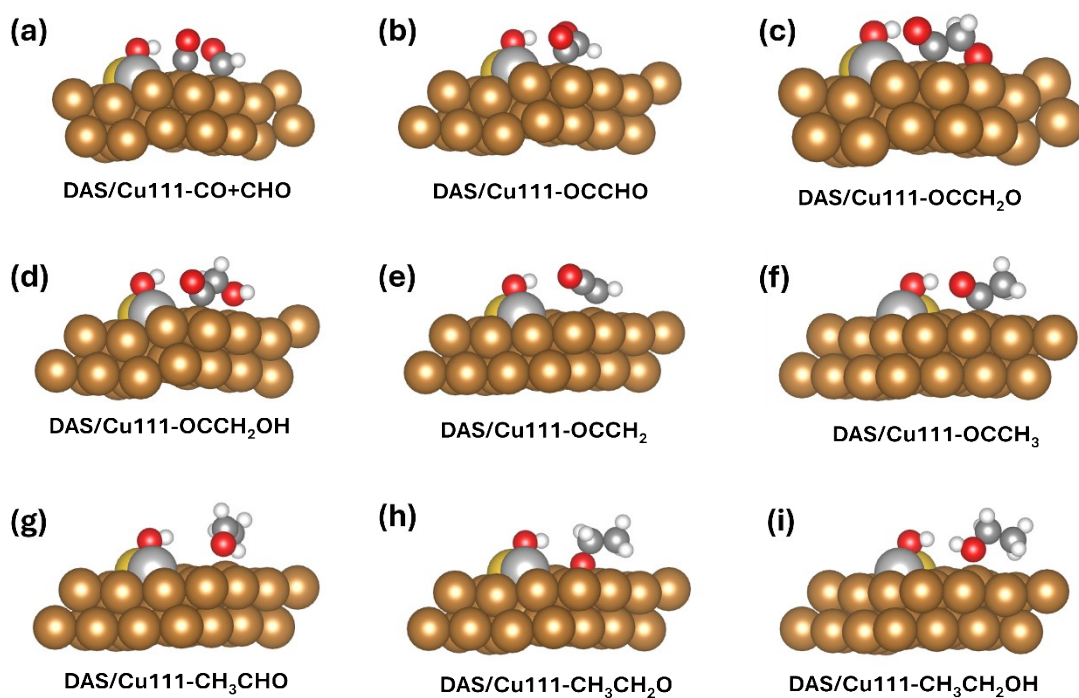

**Figure S25.** Optimized reaction intermediates along the C–C coupling pathway leading to ethanol formation on the catalyst surface.
